# Supplementary material
Source: ML conference proceedings conference paper supplement (https://proceedings.mlr.press/v97/titouan19a.html)
Supplement: Supplementary file [file titouan19a-supp.pdf]

# Supplementary material for paper: Optimal Transport for structured data and its application on graphs

## 1. Proofs

First we recall the notations from the paper :

Let two graphs  $\mathcal{G}_1$  and  $\mathcal{G}_2$  described respectively by their probability measure  $\mu = \sum_{i=1}^n h_i \delta_{(x_i, a_i)}$  and  $\nu = \sum_{j=1}^m g_j \delta_{(y_j, b_j)}$ , where  $h \in \Sigma_n$  and  $g \in \Sigma_m$  are histograms with  $\Sigma_n = \{h \in (\mathbb{R}_+^*)^n, \sum_{i=1}^n h_i = 1, \}$ .

We introduce  $\Pi(h, g)$  the set of all admissible couplings between  $h$  and  $g$ , *i.e.* the set

$$\Pi(h, g) = \left\{ \pi \in \mathbb{R}_+^{n \times m} \text{ s.t. } \sum_{i=1}^n \pi_{i,j} = h_j, \sum_{j=1}^m \pi_{i,j} = g_i \right\},$$

where  $\pi_{i,j}$  represents the amount of mass shifted from the bin  $h_i$  to  $g_j$  for a coupling  $\pi$ .

Let  $(\Omega_f, d)$  be a compact measurable space acting as the feature space. We denote the distance between the features as  $M_{AB} = (d(a_i, b_j))_{i,j}$ , a  $n \times m$  matrix.

The structure matrices are denoted  $C_1$  and  $C_2$ , and  $\mu_X$  and  $\mu_A$  (resp.  $\nu_Y$  and  $\nu_B$ ) the marginals of  $\mu$  (resp.  $\nu$ ) *w.r.t.* the structure and feature respectively. We also define the similarity between the structures by measuring the similarity between all pairwise distances within each graph thanks to the 4-dimensional tensor  $L(C_1, C_2)$ :

$$L_{i,j,k,l}(C_1, C_2) = |C_1(i, k) - C_2(j, l)|.$$

We also consider the following notations :

$$J_q(C_1, C_2, \pi) = \sum_{i,j,k,l} L_{i,j,k,l}(C_1, C_2)^q \pi_{i,j} \pi_{k,l} \quad (1)$$

$$H_q(M_{AB}, \pi) = \sum_{i,j} d(a_i, b_j)^q \pi_{i,j} \quad (2)$$

$$E_q(M_{AB}, C_1, C_2, \pi) = \langle (1 - \alpha) M_{AB}^q + \alpha L(C_1, C_2)^q \otimes \pi, \pi \rangle \\ = \sum_{i,j,k,l} (1 - \alpha) d(a_i, b_j)^q + \alpha L_{i,j,k,l}(C_1, C_2)^q \pi_{i,j} \pi_{k,l} \quad (3)$$

Respectively  $J_q$ ,  $H_q$  and  $E_q$  designate the Gromov-Wasserstein ( $GW$ ) loss, the Wasserstein ( $W$ ) loss and the  $FGW$  loss so that :

$$FGW_{q,\alpha}(\mu, \nu) = \min_{\pi \in \Pi(h,g)} E_q(M_{AB}, C_1, C_2, \pi) \quad (4)$$

$$W_q(\mu_A, \nu_B)^q = \min_{\pi \in \Pi(h,g)} H_q(M_{AB}, \pi) \quad (5)$$

$$GW_q(\mu_X, \nu_Y)^q = \min_{\pi \in \Pi(h,g)} J_q(C_1, C_2, \pi) \quad (6)$$

Please note that the minimum exists since we minimize a continuous function over a compact subset of  $\mathbb{R}^{n \times m}$  and hence the  $FGW$  distance is well defined.

### 1.1. Bounds

We first introduce the following lemma:

*Lemma 1.1.*  $FGW_{q,\alpha}(\mu, \nu)$  is lower-bounded by the straight-forward interpolation between  $W_q(\mu_A, \nu_B)^q$  and  $GW_q(\mu_X, \nu_Y)^q$ :

$$FGW_{q,\alpha}(\mu, \nu) \geq (1 - \alpha) W_q(\mu_A, \nu_B)^q + \alpha GW_q(\mu_X, \nu_Y)^q \quad (7)$$

*Proof.* Let  $\pi^\alpha$  be the coupling that minimizes  $E_q(M_{AB}, C_1, C_2, \cdot)$ . Then we have:

$$FGW_{q,\alpha}(\mu, \nu) = E_q(M_{AB}, C_1, C_2, \pi^\alpha) \\ = (1 - \alpha) H_q(M_{AB}, \pi^\alpha) + \alpha J_q(C_1, C_2, \pi^\alpha)$$

But also:

$$W_q(\mu_A, \nu_B)^q \leq H_q(M_{AB}, \pi^\alpha) \\ GW_q(\mu_X, \nu_Y)^q \leq J_q(C_1, C_2, \pi^\alpha)$$

The provided inequality is then derived.  $\square$

We also have two other straight-forward lower bounds for  $FGW$ :

$$FGW_{q,\alpha}(\mu, \nu) \geq (1 - \alpha) W_q(\mu_A, \nu_B)^q \quad (8)$$

$$FGW_{q,\alpha}(\mu, \nu) \geq \alpha GW_q(\mu_X, \nu_Y)^q \quad (9)$$

## 1.2. Interpolation properties

We now claim the following theorem:

**Theorem 1.2.** *Interpolation properties.*

As  $\alpha$  tends to zero, the FGW distance recovers  $W_q(\mu_A, \nu_B)^q$  between the features, and as  $\alpha$  tends to one, we recover  $GW_q(\mu_X, \nu_Y)^q$  between the structures:

$$\begin{aligned} \lim_{\alpha \rightarrow 0} FGW_{q,\alpha}(\mu, \nu) &= W_q(\mu_A, \nu_B)^q \\ \lim_{\alpha \rightarrow 1} FGW_{q,\alpha}(\mu, \nu) &= GW_q(\mu_X, \nu_Y)^q \end{aligned}$$

*Proof.* Let  $\pi^W \in \Pi(h, g)$  be the optimal coupling for the Wasserstein distance  $W_q(\mu_A, \nu_B)$  between  $\mu_A$  and  $\nu_B$  and let  $\pi^\alpha \in \Pi(h, g)$  be the optimal coupling for the FGW distance  $FGW_{q,\alpha}(\mu, \nu)$ . We consider :

$$\begin{aligned} &FGW_{q,\alpha}(\mu, \nu) - (1 - \alpha)W_q(\mu_A, \nu_B)^q \\ &= E_q(M_{AB}, C_1, C_2, \pi^\alpha) - (1 - \alpha)H_q(M_{AB}, \pi^W) \\ &\stackrel{*}{\leq} E_q(M_{AB}, C_1, C_2, \pi^W) - (1 - \alpha)H_q(M_{AB}, \pi^W) \\ &= \sum_{i,j,k,l} \alpha |C_1(i, k) - C_2(j, l)|^q \pi_{i,j}^W \pi_{k,l}^W \\ &= \alpha J_q(C_1, C_2, \pi^W) \end{aligned}$$

In (\*) we used the suboptimality of the coupling  $\pi^W$  w.r.t the FGW distance. In this way we have proven :

$$FGW_{q,\alpha}(\mu, \nu) \leq (1 - \alpha)W_q(\mu_A, \nu_B)^q + \alpha J_q(C_1, C_2, \pi^W) \quad (10)$$

Now let  $\pi^{GW} \in \Pi(h, g)$  the optimal coupling for the Gromov-Wasserstein distance  $GW_q(\mu_X, \nu_Y)$  between  $\mu_X$  and  $\nu_Y$ . Then :

$$\begin{aligned} &FGW_{q,\alpha}(\mu, \nu) - \alpha GW_q(\mu_X, \nu_Y)^q \\ &= E_q(M_{AB}, C_1, C_2, \pi^\alpha) - \alpha J_q(C_1, C_2, \pi^{GW}) \\ &\stackrel{*}{\leq} E_q(M_{AB}, C_1, C_2, \pi^{GW}) - \alpha J_q(C_1, C_2, \pi^{GW}) \\ &= (1 - \alpha) \sum_{i,j,k,l} (1 - \alpha) d(a_i, b_j)^q \pi_{i,j}^{GW} \\ &= (1 - \alpha) H_q(M_{AB}, \pi^{GW}) \end{aligned}$$

where in (\*) we used the suboptimality of the coupling  $\pi^{GW}$  w.r.t the FGW distance so that :

$$FGW_{q,\alpha}(\mu, \nu) \leq \alpha GW_q(\mu_X, \nu_Y)^q + (1 - \alpha) H_q(M_{AB}, \pi^{GW}) \quad (11)$$

As  $\alpha$  goes to zero Eq. (10) and Eq. (8) give  $\lim_{\alpha \rightarrow 0} FGW_{q,\alpha}(\mu, \nu) = W_q(\mu_A, \nu_B)^q$  and as  $\alpha$  goes to one Eq. (11) and Eq. (9) give  $\lim_{\alpha \rightarrow 1} FGW_{q,\alpha}(\mu, \nu) = GW_q(\mu_X, \nu_Y)^q$

□

## 1.3. FGW is a distance

For the following proofs we suppose that  $C_1$  and  $C_2$  are distance matrices,  $n \geq m$  and  $\alpha \in ]0, \dots, 1[$ . We claim the following theorem :

**Theorem 1.3.** *FGW defines a metric for  $q = 1$  and a semi-metric for  $q > 1$ .*

FGW defines a metric over the space of structured data quotiented by the measure preserving isometries that are also feature preserving. More precisely, FGW satisfies the triangle inequality and is nul iff  $n = m$  and there exists a bijection  $\sigma : \{1, \dots, n\} \rightarrow \{1, \dots, n\}$  such that :

$$\forall i \in \{1, \dots, n\}, h_i = g_{\sigma(i)} \quad (12)$$

$$\forall i \in \{1, \dots, n\}, a_i = b_{\sigma(i)} \quad (13)$$

$$\forall i, k \in \{1, \dots, n\}^2, C_1(i, k) = C_2(\sigma(i), \sigma(k)) \quad (14)$$

If  $q > 1$ , the triangle inequality is relaxed by a factor  $2^{q-1}$  such that FGW defines a semi-metric

We first prove the equality relation for any  $q \geq 1$  and we discuss the triangle inequality in the next section.

### 1.3.1. EQUALITY RELATION

**Theorem 1.4.** *For all  $q \geq 1$ ,  $FGW_{q,\alpha}(\mu, \nu) = 0$  iff there exists an application  $\sigma : \{1, \dots, n\} \rightarrow \{1, \dots, m\}$  which verifies (12), (13) and (14)*

*Proof.* First, let us suppose that  $n = m$  and that such a bijection exists. Then if we consider the transport map  $\pi^*$  associated with  $i \rightarrow i$  and  $j \rightarrow \sigma(i)$  i.e the map  $\pi^* = (I_d \times \sigma)$  with  $I_d$  the identity map.

By eq (12),  $\pi^* \in \Pi(h, g)$  and clearly using (13) and (14):

$$\begin{aligned} E_q(C_1, C_2, \pi^*) &= (1 - \alpha) \sum_{i,k} d(a_i, b_{\sigma(i)})^q h_i g_{\sigma(i)} h_k g_{\sigma(k)} \\ &\quad + \alpha \sum_{i,k} |C_1(i, k) - C_2(\sigma(i), \sigma(k))|^q h_i g_{\sigma(i)} h_k g_{\sigma(k)} \\ &= 0 \end{aligned} \quad (15)$$

We can conclude that  $FGW_{q,\alpha}(\mu, \nu) = 0$ .

Conversely, suppose that  $FGW_{q,\alpha}(\mu, \nu) = 0$  and  $q \geq 1$ .  
We define :

$$\forall i, k \in \{1, \dots, n\}^2, \hat{C}_1(i, k) = \frac{1}{2}C_1(i, k) + \frac{1}{2}d(a_i, a_k) \quad (16)$$

$$\forall j, l \in \{1, \dots, m\}^2, \hat{C}_2(j, l) = \frac{1}{2}C_2(j, l) + \frac{1}{2}d(b_j, b_l) \quad (17)$$

To prove the existence of a bijection  $\sigma$  satisfying the theorem properties we will prove that the Gromov-Wasserstein distance  $GW_q(\hat{C}_1, \hat{C}_2, \mu, \nu)$  vanishes.

Let  $\pi \in \Pi(h, g)$  be any admissible transportation plan. Then for  $n \geq 1$ ,

$$\begin{aligned} J_n(\hat{C}_1, \hat{C}_2, \pi) &= \sum_{i,j,k,l} L(\hat{C}_1(i, k), \hat{C}_2(j, l))^n \pi_{i,j} \pi_{k,l} \\ &= \sum_{i,j,k,l} \left| \frac{1}{2}(C_1(i, k) - C_2(j, l)) + \frac{1}{2}(d(a_i, a_k) - d(b_j, b_l)) \right|^{2n} \pi_{i,j} \pi_{k,l} \\ &\leq \sum_{i,j,k,l} \frac{1}{2} |C_1(i, k) - C_2(j, l)|^{2n} \pi_{i,j} \pi_{k,l} \\ &\quad + \sum_{i,j,k,l} \frac{1}{2} |d(a_i, a_k) - d(b_j, b_l)|^{2n} \pi_{i,j} \pi_{k,l} \end{aligned}$$

In (\*) we used the convexity of  $t \rightarrow t^n$  and Jensen inequality. We denote the first term (I) and (II) the second term. Combining triangle inequalities  $d(a_i, a_k) \leq d(a_i, b_j) + d(b_j, a_k)$  and  $d(b_j, a_k) \leq d(b_j, b_l) + d(b_l, a_k)$  we have :

$$d(a_i, a_k) \leq d(a_i, b_j) + d(a_k, b_l) + d(b_j, b_l) \quad (18)$$

We split (II) in two parts  $S_1 = \{i, j, k, l ; d(a_i, a_k) - d(b_j, b_l) \geq 0\}$  and  $S_2 = \{i, j, k, l ; d(a_i, a_k) - d(b_j, b_l) \leq 0\}$  such that

$$\begin{aligned} (II) &= \sum_{i,j,k,l \in S_1} (d(a_i, a_k) - d(b_j, b_l))^{2n} \pi_{i,j} \pi_{k,l} \\ &\quad + \sum_{i,j,k,l \in S_2} (d(b_j, b_l) - d(a_i, a_k))^{2n} \pi_{i,j} \pi_{k,l} \end{aligned}$$

In the same way as Eq. (18) we have :

$$d(b_j, b_l) \leq d(a_i, a_k) + d(a_i, b_j) + d(a_k, b_l) \quad (19)$$

So Eq. (18) and (19) give :

$$(II) \leq \sum_{i,j,k,l} \frac{1}{2} |d(a_i, b_j) + d(a_k, b_l)|^{2n} \pi_{i,j} \pi_{k,l} \stackrel{def}{=} M_n(\pi) \quad (20)$$

Finally we have shown that :

$$\forall \pi \in \Pi(h, g), \forall n \geq 1, J_n(\hat{C}_1, \hat{C}_2, \pi) \leq \frac{1}{2} J_n(C_1, C_2, \pi) + M_n(\pi) \quad (21)$$

Now let  $\pi^*$  be the optimal coupling for  $FGW_{q,\alpha}(\mu, \nu)$ . If  $FGW_{q,\alpha}(\mu, \nu) = 0$  then since  $E_q(C_1, C_2, \pi^*) \geq \alpha J_q(C_1, C_2, \pi^*)$  and  $E_q(C_1, C_2, \pi^*) \geq (1 - \alpha)H_q(M_{AB}, \pi^*)$ , we have:

$$J_q(C_1, C_2, \pi^*) = 0 \quad (22)$$

$$H_q(M_{AB}, \pi^*) = 0$$

Then  $\sum_{i,j} d(a_i, b_j)^q \pi_{i,j}^* = 0$ . Since all terms are positive we can conclude that  $\forall m \in \mathbb{N}^*$ ,  $\sum_{i,j} d(a_i, b_j)^m \pi_{i,j}^* = 0$ .

In this way :

$$\begin{aligned} M_q(\pi^*) &= \frac{1}{2} \sum_h \binom{q}{p} \left( \sum_{i,j} d(a_i, b_j)^p \pi_{i,j}^* \right) \left( \sum_{k,l} d(a_k, b_l)^{q-p} \pi_{k,l}^* \right) \\ &= 0 \end{aligned} \quad (23)$$

Using equations (21) and (22) we have shown :

$$J_q(\hat{C}_1, \hat{C}_2, \pi^*) = 0$$

So  $\pi^*$  is the optimal coupling for  $GW_q(\hat{C}_1, \hat{C}_2, \mu, \nu)$  and  $GW_q(\hat{C}_1, \hat{C}_2, \mu, \nu) = 0$ . By virtue to Gromov-Wasserstein properties (see (Memoli, 2011)), there exists an isomorphism between the metric spaces associated with  $\mu$  and  $\nu$ . In the discrete case this results in the existence of a function  $\sigma : \{1, \dots, m\} \rightarrow \{1, \dots, n\}$  which is a weight preserving isometry and thus bijective. In this way, we have  $m = n$  and  $\sigma$  verifying Eq (12). The isometry property leads also to :

$$\forall i, k \in \{1, \dots, n\}^2, \hat{C}_1(i, k) = \hat{C}_2(\sigma(i), \sigma(k)) \quad (24)$$

Moreover, since  $\pi^*$  is the optimal coupling for  $GW_q(\hat{C}_1, \hat{C}_2, \mu, \nu)$  leading to a zero cost, then  $\pi^*$  is supported by  $\sigma$ , in particular  $\pi^* = (I_d \times \sigma)$

So  $H_q(M_{AB}, \pi^*) = \sum_i d(a_i, b_{\sigma(i)})^q h_i g_{\sigma(i)}$ . Since  $H_q(M_{AB}, \pi^*) = 0$  and all the weights are strictly positive we can conclude that  $a_i = b_{\sigma(i)}$ .

In this way,  $d(a_i, a_k) = d(b_{\sigma(i)}, b_{\sigma(k)})$ , so using the equality (24) and the definition of  $\hat{C}_1$  and  $\hat{C}_2$  in (16) and (17) we can conclude that :

$$\forall i, k \in \{1, \dots, n\} \times \{1, \dots, n\}, C_1(i, k) = C_2(\sigma(i), \sigma(k))$$

which concludes the proof.  $\square$

### 1.3.2. TRIANGLE INEQUALITY

**Theorem 1.5.** For all  $q = 1$ ,  $FGW$  verifies the triangle inequality.

*Proof.* To prove the triangle inequality of  $FGW$  distance for arbitrary measures we will use the gluing lemma (see (Villani, 2008)) which stresses the existence of couplings with a prescribed structure. Let  $h, g, f \in \Sigma_n \times \Sigma_m \times \Sigma_k$ . Let also  $\mu = \sum_{i=1}^n h_i \delta_{a_i, x_i}$ ,  $\nu = \sum_{j=1}^m g_j \delta_{b_j, y_j}$  and  $\gamma = \sum_{p=1}^k f_p \delta_{c_p, z_p}$  be three structured data as described in the paper. We note  $C_1(i, k)$  the distance between vertices  $x_i$  and  $x_k$ ,  $C_2(i, k)$  the distance between vertices  $y_i$  and  $y_k$  and  $C_3(i, k)$  the distance between vertices  $z_i$  and  $z_k$ .

Let  $P$  and  $Q$  be two optimal solutions of the  $FGW$  transportation problem between  $\mu$  and  $\nu$  and  $\nu$  and  $\gamma$  respectively.

We define :

$$S = P \text{diag}\left(\frac{1}{g}\right) Q$$

(note that  $S$  is well defined since  $g_j \neq 0$  for all  $j$ ). Then by definition  $S \in \Pi(h, f)$  because :

$$S1_m = P \text{diag}\left(\frac{1}{g}\right) Q1_m = P \text{diag}\left(\frac{g}{g}\right) = P1_m = h \text{ (same reasoning for } f).$$

We first prove the triangle inequality for the case  $q = 1$ .

By suboptimality of  $S$  :

$$\begin{aligned} & FGW_{1,\alpha}(C_1, C_3, \mu, \gamma) \\ & \leq \sum_{i,j,k,l} (1-\alpha)d(a_i, c_j) + \alpha L(C_1(i, k), C_3(j, l)) S_{i,j} S_{k,l} \\ & = \sum_{i,j,k,l} ((1-\alpha)d(a_i, c_j) + \alpha L(C_1(i, k), C_3(j, l))) \\ & \quad \times \left( \sum_e \frac{P_{i,e} Q_{e,j}}{g_e} \right) \left( \sum_o \frac{P_{k,o} Q_{o,l}}{g_o} \right) \\ & = \sum_{i,j,k,l} ((1-\alpha)d(a_i, c_j) + \alpha |C_1(i, k) - C_3(j, l)|) \\ & \quad \times \left( \sum_e \frac{P_{i,e} Q_{e,j}}{g_e} \right) \left( \sum_o \frac{P_{k,o} Q_{o,l}}{g_o} \right) \\ & \stackrel{*}{\leq} \sum_{i,j,k,l,e,o} ((1-\alpha)(d(a_i, b_e) + d(b_e, c_j)) \\ & \quad + \alpha |C_1(i, k) - C_2(e, o) + C_2(e, o) - C_3(j, l)|) \\ & \quad \times \left( \frac{P_{i,e} Q_{e,j}}{g_e} \right) \left( \frac{P_{k,o} Q_{o,l}}{g_o} \right) \\ & \stackrel{**}{\leq} \sum_{i,j,k,l,e,o} ((1-\alpha)d(a_i, b_e) + \alpha L(C_1(i, k), C_2(e, o))) \\ & \quad \times \frac{P_{i,e} Q_{e,j}}{g_e} \frac{P_{k,o} Q_{o,l}}{g_o} \\ & \quad + \sum_{i,j,k,l,e,o} ((1-\alpha)d(b_e, c_j) + \alpha L(C_2(e, o), C_3(j, l))) \\ & \quad \times \frac{P_{i,e} Q_{e,j}}{g_e} \frac{P_{k,o} Q_{o,l}}{g_o} \end{aligned}$$

where in (\*) we use the triangle inequality of  $d$  and in (\*\*) the triangle inequality of  $|\cdot|$

Moreover we have :

$$\sum_j \frac{Q_{e,j}}{g_e} = 1, \sum_l \frac{Q_{o,l}}{g_o} = 1, \sum_i \frac{P_{i,e}}{g_e} = 1, \sum_k \frac{P_{k,o}}{g_o} = 1$$

So,

$$\begin{aligned} & FGW_{1,\alpha}(C_1, C_3, \mu, \gamma) \\ & \leq \sum_{i,k,e,o} ((1-\alpha)d(a_i, b_e) + \alpha L(C_1(i, k), C_2(e, o))) P_{i,e} P_{k,o} \\ & \quad + \sum_{l,j,e,o} ((1-\alpha)d(b_e, c_j) + \alpha L(C_2(e, o), C_3(j, l))) Q_{e,j} Q_{o,l} \end{aligned}$$

Since  $P$  and  $Q$  are the optimal plans we have :

$$FGW_{1,\alpha}(C_1, C_3, \mu, \gamma) \leq FGW_{1,\alpha}(C_1, C_2, \mu, \nu) + FGW_{1,\alpha}(C_2, C_3, \nu, \gamma)$$

which prove the triangle inequality for  $q = 1$ .  $\square$

**Theorem 1.6.** For all  $q > 1$ ,  $FGW$  verifies the relaxed triangle inequality :

$$FGW_{q,\alpha}(C_1, C_3, \mu, \gamma) \leq 2^{q-1}(FGW_{q,\alpha}(C_1, C_2, \mu, \nu) + FGW_{q,\alpha}(C_2, C_3, \nu, \gamma))$$

*Proof.* Let  $q > 1$ , We have :

$$\forall x, y \in \mathbb{R}_+, (x + y)^q \leq 2^{q-1}(x^q + y^q) \quad (25)$$

Indeed,

$$\begin{aligned} (x + y)^q &= \left( \left( \frac{1}{2^{q-1}} \right)^{\frac{1}{q}} \frac{x}{\left( \frac{1}{2^{q-1}} \right)^{\frac{1}{q}}} + \left( \frac{1}{2^{q-1}} \right)^{\frac{1}{q}} \frac{y}{\left( \frac{1}{2^{q-1}} \right)^{\frac{1}{q}}} \right)^q \leq \\ & \left[ \left( \frac{1}{2^{q-1}} \right)^{\frac{1}{q-1}} + \left( \frac{1}{2^{q-1}} \right)^{\frac{1}{q-1}} \right]^{q-1} \left( \frac{x^q}{2^{q-1}} + \frac{y^q}{2^{q-1}} \right) \\ &= \frac{x^q}{2^{q-1}} + \frac{y^q}{2^{q-1}} \end{aligned}$$

Last inequality is a consequence of Hölder inequality. Then using same notations :

$$\begin{aligned} &FGW_{q,\alpha}(C_1, C_3, \mu, \gamma) \\ &\leq \sum_{i,j} \sum_{k,l} (1 - \alpha)d(a_i, c_j)^q + \alpha L(C_1(i, k), C_3(j, l))^q S_{i,j} S_{k,l} \\ &= \sum_{i,j} \sum_{k,l} ((1 - \alpha)d(a_i, c_j)^q + \alpha L(C_1(i, k), C_3(j, l))^q) \\ &\times \left( \sum_e \frac{P_{i,e} Q_{e,j}}{g_e} \right) \left( \sum_o \frac{P_{k,o} Q_{o,l}}{g_o} \right) \\ &= \sum_{i,j,k,l} ((1 - \alpha)d(a_i, c_j)^q + \alpha |C_1(i, k) - C_3(j, l)|^q) \\ &\times \left( \sum_e \frac{P_{i,e} Q_{e,j}}{g_e} \right) \left( \sum_o \frac{P_{k,o} Q_{o,l}}{g_o} \right) \\ &\stackrel{*}{\leq} \sum_{i,j,k,l,e,o} ((1 - \alpha)(d(a_i, b_e) + d(b_e, c_j))^q \\ &+ \alpha |C_1(i, k) - C_2(e, o) + C_2(e, o) - C_3(j, l)|^q) \\ &\times \left( \frac{P_{i,e} Q_{e,j}}{g_e} \right) \left( \frac{P_{k,o} Q_{o,l}}{g_o} \right) \\ &\stackrel{**}{\leq} 2^{q-1} \sum_{i,j,k,l,e,o} ((1 - \alpha)d(a_i, b_e)^q + \alpha L(C_1(i, k), C_2(e, o))^q) \\ &\times \frac{P_{i,e} Q_{e,j}}{g_e} \frac{P_{k,o} Q_{o,l}}{g_o} \\ &+ 2^{q-1} \sum_{i,j,k,l,e,o} ((1 - \alpha)d(b_e, c_j)^q + \alpha L(C_2(e, o), C_3(j, l))^q) \\ &\times \frac{P_{i,e} Q_{e,j}}{g_e} \frac{P_{k,o} Q_{o,l}}{g_o} \end{aligned}$$

where in (\*) we use the triangle inequality of  $d$  and in (\*\*) the triangle inequality of  $|\cdot|$  and (25).

Since  $P$  and  $Q$  are the optimal plans we have :

$$FGW_{q,\alpha}(C_1, C_3, \mu, \gamma) \leq 2^{q-1}(FGW_{q,\alpha}(C_1, C_2, \mu, \nu) + FGW_{q,\alpha}(C_2, C_3, \nu, \gamma))$$

Table 1. Percentage of  $\alpha$  chosen in  $]0, \dots, 1[$  compared to  $\{0, 1\}$  for discrete labeled graphs

| DISCRETE ATTR. | MUTAG | NC11 | PTC |
|----------------|-------|------|-----|
| FGW RAW SP     | 100%  | 100% | 98% |
| FGW WL H=2 SP  | 100%  | 100% | 88% |
| FGW WL H=4 SP  | 100%  | 100% | 88% |

Table 2. Percentage of  $\alpha$  chosen in  $]0, \dots, 1[$  compared to  $\{0, 1\}$  for vector attributed graphs

| VECTOR ATTRIBUTES | BZR  | COX2 | CUNEIFORM | ENZYMES | PROTEIN | SYNTHETIC |
|-------------------|------|------|-----------|---------|---------|-----------|
| FGW SP            | 100% | 90%  | 100%      | 100%    | 100%    | 100%      |

Which prove that  $FGW_{q,\alpha}$  defines a semi metric for  $q > 1$  with coefficient  $2^{q-1}$  for the triangle inequality relaxation.  $\square$

## 2. Comparaison with $W$ and $GW$

**Cross validation results** During the nested cross validation, we divided the dataset into 10 and use 9 folds for training, where  $\alpha$  is chosen within  $[0, 1]$  via a 10-CV cross-validation, 1 fold for testing, with the best value of  $\alpha$  (with the best average accuracy on the 10-CV) previously selected. The experiment is repeated 10 times for each dataset except for MUTAG and PTC where it is repeated 50 times. Table 2 and 2 report the average number of time  $\alpha$  was chose within  $]0, \dots, 1[$  without 0 and 1 corresponding to the Wasserstein and Gromov-Wasserstein distances respectively. Results suggests that both structure and feature pieces of information are necessary as  $\alpha$  is consistently selected inside  $]0, \dots, 1[$  except for PTC and COX2.

**Nested CV results** We report in tables 3 and 4 the average classification accuracies of the nested classification procedure by taking  $W$  and  $GW$  instead of  $FGW$  ( $i.e$  by taking  $\alpha = 0, 1$ ). Best result for each dataset is in bold. A (\*) is added when best score does not yield to a significative improvement compared to the second best score. The significance is based on a Wilcoxon signed rank test between the best method and the second one.

Results illustrates that  $FGW$  encompasses the two cases of  $W$  and  $GW$ , as scores of  $FGW$  are usually greater or equal on every dataset than scores of both  $W$  and  $GW$  and when it is not the case the difference is not statistically significant.

Table 3. Average classification accuracy on the graph datasets with vector attributes.

| VECTOR ATTRIBUTES | BZR                | COX2               | CUNEIFORM         | ENZYMES            | PROTEIN            | SYNTHETIC          |
|-------------------|--------------------|--------------------|-------------------|--------------------|--------------------|--------------------|
| FGW SP            | 85.12±4.15         | <b>77.23±4.86*</b> | <b>76.67±7.04</b> | 71.00±6.76         | 74.55±2.74         | <b>100.00±0.00</b> |
| W                 | <b>85.36±4.87*</b> | 77.23±3.16         | 61.48±10.23       | <b>71.16±6.32*</b> | <b>75.98±1.97*</b> | 34.07±11.33        |
| GW SP             | 82.92±6.72         | 77.65±5.88         | 50.66±8.91        | 23.66±3.63         | 71.96±2.40         | 41.66±4.28         |

Table 4. Average classification accuracy on the graph datasets with discrete attributes.

| DISCRETE ATTR. | MUTAG             | NCI1               | PTC-MR             |
|----------------|-------------------|--------------------|--------------------|
| FGW RAW SP     | 83.26±10.30       | 72.82±1.46         | 55.71±6.74         |
| FGW WL H=2 SP  | 86.42±7.81        | 85.82±1.16         | 63.20±7.68         |
| FGW WL H=4 SP  | <b>88.42±5.67</b> | <b>86.42±1.63*</b> | 65.31±7.90         |
| W RAW SP       | 79.36±3.49        | 70.5±4.63          | 54.79±5.76         |
| W WL H=2 SP    | 87.78±8.64        | 85.83±1.75         | 63.90±7.66         |
| W WL H=4 SP    | 87.15±8.23        | 86.42±1.64         | <b>66.28±6.95*</b> |
| GW SP          | 82.73±9.59        | 73.40±2.80         | 54.45±6.89         |

**Timings** In this paragraph we provide some timings for the discrete attributed datasets. Table 5 displays the average timing for computing *FGW* between two pair of graphs.

Table 5. Average timings for the computation of *FGW* between two pairs of graph

| DISCRETE ATTR. | MUTAG  | NCI1   | PTC-MR |
|----------------|--------|--------|--------|
| FGW            | 2.5 MS | 7.3 MS | 3.7 MS |

## References

Memoli, F. Gromov wasserstein distances and the metric approach to object matching. *Foundations of Computational Mathematics*, pp. 1–71, 2011. ISSN 1615-3375. URL <http://dx.doi.org/10.1007/s10208-011-9093-5>. 10.1007/s10208-011-9093-5.

Villani, C. *Optimal Transport: Old and New*. Grundlehren der mathematischen Wissenschaften. Springer, 2009 edition, September 2008. ISBN 3540710493.
